# Supplementary material
Source: Royal Society of Chemistry journal article supplement (doi:10.1039/d6ce00194g)
Supplement: d6ce00194g1.pdf [file d6ce00194g1.pdf]

## Supplementary information

# Structure and Luminescence Color Change of Iridium(III) Bis-Terpyridine Complex Crystal Triggered by Water Sorption/Desorption

Yusuke Endo<sup>1</sup>, Mio Kondo<sup>1</sup>, Tomoe Nakamura<sup>1</sup>, Shingo Hattori<sup>1</sup>, Akiko Sekine<sup>2</sup>, Sosuke Kojo<sup>2</sup>, Kazuteru Shinozaki<sup>1</sup>

|        |                                                                                                               |     |
|--------|---------------------------------------------------------------------------------------------------------------|-----|
| (i)    | Thermogravimetry (TG) results                                                                                 | p2  |
| (ii)   | A DSC result for [Ir(tpy) <sub>2</sub> ]Br <sub>3</sub> ·7H <sub>2</sub> O ( <b>M7</b> )                      | p3  |
| (iii)  | A result of X-ray crystallography for [Ir(tpy) <sub>2</sub> ]Br <sub>3</sub> ·7H <sub>2</sub> O ( <b>M7</b> ) | p4  |
| (iv)   | A result of X-ray crystallography for [Ir(tpy) <sub>2</sub> ]Br <sub>3</sub> ·2H <sub>2</sub> O ( <b>M2</b> ) | p6  |
| (v)    | Simulation of PXRD patterns                                                                                   | p8  |
| (vi)   | PXRD results for <b>M7</b> , <b>M2</b> , <b>M1</b> , <b>M0</b>                                                | p9  |
| (vii)  | Emission spectrum of <b>M7</b>                                                                                | p10 |
| (viii) | Emission lifetimes of <b>M7</b> and <b>M2</b>                                                                 | p11 |
| (ix)   | Vapochromic behaviors for the <b>M7–M2</b> system                                                             | p11 |
| (x)    | Vapochromic behaviors for the <b>M2–M0</b> system                                                             | p12 |
| (xi)   | References                                                                                                    | p13 |

### (i) Thermogravimetry (TG) results

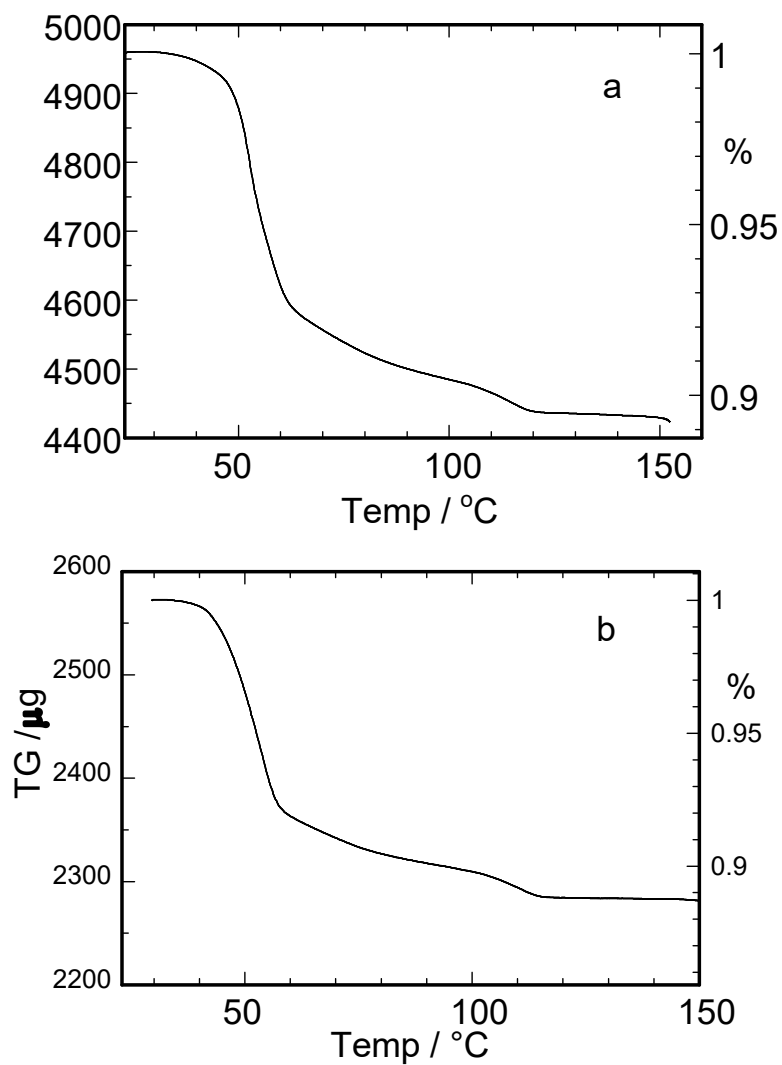

**Fig. S1.** TG curves for 4.96 mg (a) and 2.57 mg (b)  $[\text{Ir}(\text{tpy})_2]\text{Br}_3$  salts experienced the heating at 150°C and the cooling at ambient temperature under the humid condition. The numbers of crystal waters are determined as 6.0184 and 6.4087, respectively.

**(ii) A DSC result for  $[\text{Ir}(\text{tpy})_2]\text{Br}_3 \cdot 7\text{H}_2\text{O}$  (M7)**

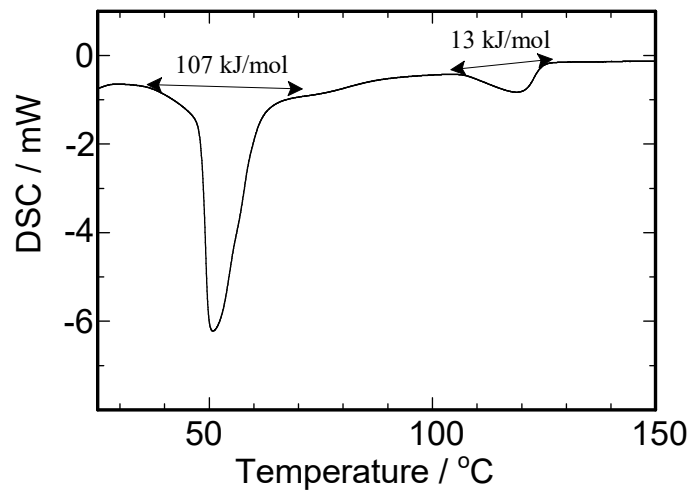

**Fig. S2.** A DSC curve for **M7** measured at 5°C/min.

**(iii) A result of X-ray crystallography for [Ir(tpy)<sub>2</sub>]Br<sub>3</sub>·7H<sub>2</sub>O (M7)**

**Table S1.** Crystal data for [Ir(tpy)<sub>2</sub>]Br<sub>3</sub>·7H<sub>2</sub>O (M7)

|                             | <b>[Ir(tpy)<sub>2</sub>]Br<sub>3</sub>·7H<sub>2</sub>O</b>                       |
|-----------------------------|----------------------------------------------------------------------------------|
| Empirical formula           | C <sub>30</sub> H <sub>36</sub> O <sub>7</sub> Br <sub>3</sub> N <sub>6</sub> Ir |
| Crystal system              | triclinic                                                                        |
| Space group                 | <i>P</i> -1 (#2)                                                                 |
| Temp. (°C)                  | -150 ± 1                                                                         |
| <i>a</i> (Å)                | 9.1535(3)                                                                        |
| <i>b</i> (Å)                | 10.7988(2)                                                                       |
| <i>c</i> (Å)                | 18.2428(3)                                                                       |
| $\alpha$ (°)                | 76.4504(15)                                                                      |
| $\beta$ (°)                 | 88.342(2)                                                                        |
| $\gamma$ (°)                | 87.051(2)                                                                        |
| <i>Z</i>                    | 2                                                                                |
| <i>V</i> (Å <sup>3</sup> )  | 1750.47(7)                                                                       |
| $\rho$ (g/cm <sup>3</sup> ) | 1.944                                                                            |
| <i>R</i> <sub>1</sub>       | 0.0552                                                                           |
| w <i>R</i> <sub>2</sub>     | 0.1537                                                                           |

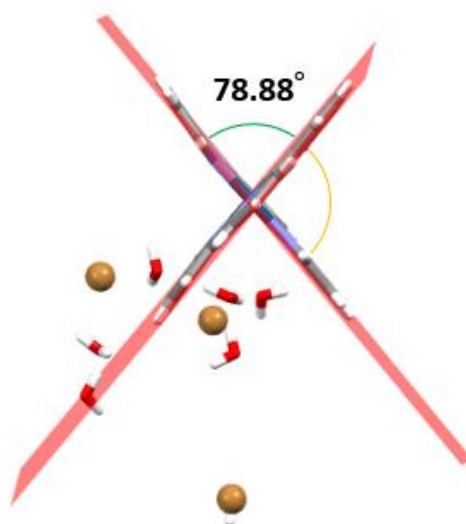

**[Ir(tpy)<sub>2</sub>]Br<sub>3</sub>·7H<sub>2</sub>O (M7)**

**Fig. S3.** Dihedral angle between the two tpy ligand planes in **M7**. The dihedral angle was calculated between the plane defined by atoms Ir1, C10, C15, and C20 and the plane defined by Ir1, C25, C30, and C35. The tpy ligand planes are shown in red in the figure.

**Table S2.** Hydrogen bonding parameters for  $[\text{Ir}(\text{tpy})_2]\text{Br}_3 \cdot 7\text{H}_2\text{O}$  (**M7**)

| Atom1 | Atom2 | Length(Å) | Symm. op. 1 | Symm. op. 2 |
|-------|-------|-----------|-------------|-------------|
| Br1   | O4    | 3.366     | x,y,z       | 1-x,1-y,1-z |
| Br1   | O6    | 3.327     | x,y,z       | 1-x,1-y,1-z |
| Br2   | O1    | 3.285     | x,y,z       | 1-x,1-y,1-z |
| Br2   | O7    | 3.32      | x,y,z       | x,y,z       |
| Br3   | O1    | 3.282     | x,y,z       | x,y,z       |
| Br3   | O3    | 3.362     | x,y,z       | 1+x,y,z     |
| O1    | O2    | 2.814     | x,y,z       | x,y,z       |
| O2    | O3    | 2.814     | x,y,z       | x,y,z       |
| O2    | O4    | 2.751     | x,y,z       | x,y,z       |
| O4    | O5    | 2.758     | x,y,z       | 1-x,1-y,1-z |
| O5    | O6    | 2.764     | x,y,z       | x,y,z       |

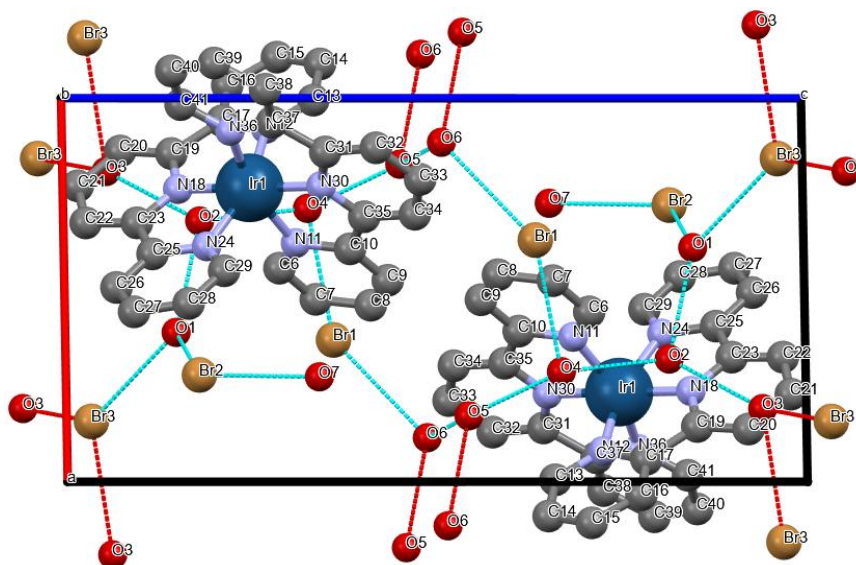

**Fig. S4.** Hydrogen bond network for  $[\text{Ir}(\text{tpy})_2]\text{Br}_3 \cdot 7\text{H}_2\text{O}$  (**M7**).

(iv) A result of X-ray crystallography for  $[\text{Ir}(\text{tpy})_2]\text{Br}_3 \cdot 2\text{H}_2\text{O}$  (M2)

Table S3. Crystal data for  $[\text{Ir}(\text{tpy})_2]\text{Br}_3 \cdot 2\text{H}_2\text{O}$  (M2)

|                                   | $[\text{Ir}(\text{tpy})_2]\text{Br}_3 \cdot 2\text{H}_2\text{O}$     |
|-----------------------------------|----------------------------------------------------------------------|
| Empirical formula                 | $\text{C}_{30}\text{H}_{26}\text{Br}_3\text{O}_2\text{N}_6\text{Ir}$ |
| Crystal system                    | orthorhombic                                                         |
| Space group                       | $Pna2_1$ (#33)*                                                      |
| Temp. ( $^\circ\text{C}$ )        | $-150 \pm 1$                                                         |
| $a$ ( $\text{\AA}$ )              | 9.72848(19)                                                          |
| $b$ ( $\text{\AA}$ )              | 16.4054(3)                                                           |
| $c$ ( $\text{\AA}$ )              | 18.5653(4)                                                           |
| $\alpha$ ( $^\circ$ )             | 90                                                                   |
| $\beta$ ( $^\circ$ )              | 90                                                                   |
| $\gamma$ ( $^\circ$ )             | 90                                                                   |
| $Z$                               | 4                                                                    |
| $V$ ( $\text{\AA}^3$ )            | 2963.01(10)                                                          |
| $\rho$ ( $\text{g}/\text{cm}^3$ ) | 2.095                                                                |
| $R_1$                             | 0.0257                                                               |
| $wR_2$                            | 0.0525                                                               |

\*CIFcheck suggested the possibility of the  $Pnna$  space group; therefore, refinement was also performed in  $Pnna$ . However, the  $\text{tpy}$  ligand had to be modeled as disordered, many atoms showed non-positive definite or abnormally small displacement parameters, and the  $R$  factor ( $R_1 \approx 15\%$ ) was significantly higher than that for  $Pna2_1$  ( $R_1 = 2.57\%$ ). These results indicate that  $Pna2_1$  is the more appropriate space group for this structure.

Table S4. Crystal data for  $[\text{Ir}(\text{tpy})_2]\text{Br}_3 \cdot 2\text{H}_2\text{O}$  (M2)

| Atom1 | Atom2 | Length( $\text{\AA}$ ) | Symm. op. 1 | Symm. op. 2     |
|-------|-------|------------------------|-------------|-----------------|
| Br40  | O42   | 3.358                  | $x,y,z$     | $1-x,1-y,1/2+z$ |
| O41   | Br39  | 3.355                  | $x,y,z$     | $2-x,1-y,1/2+z$ |

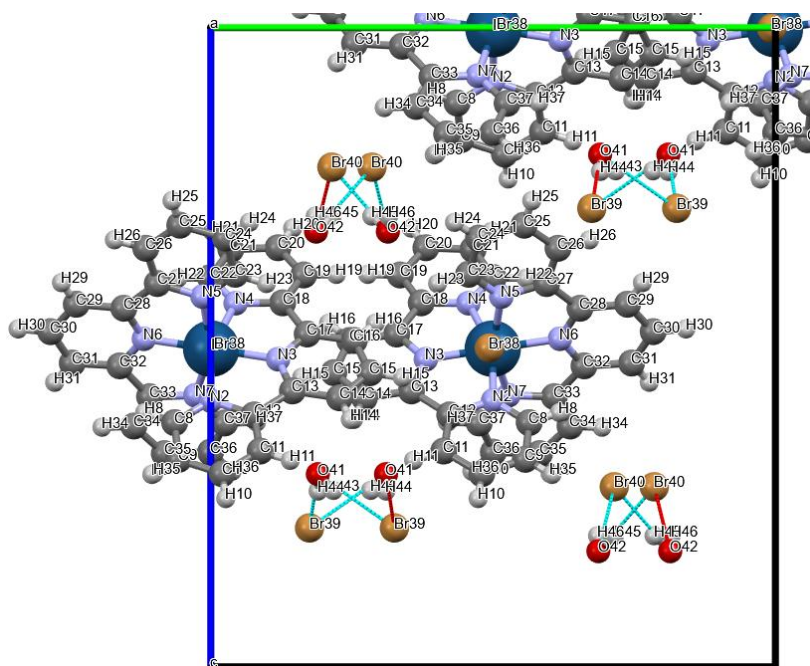

**Fig. S5.** Hydrogen bond network for  $[\text{Ir}(\text{tpy})_2]\text{Br}_3 \cdot 2\text{H}_2\text{O}$  (**M2**).

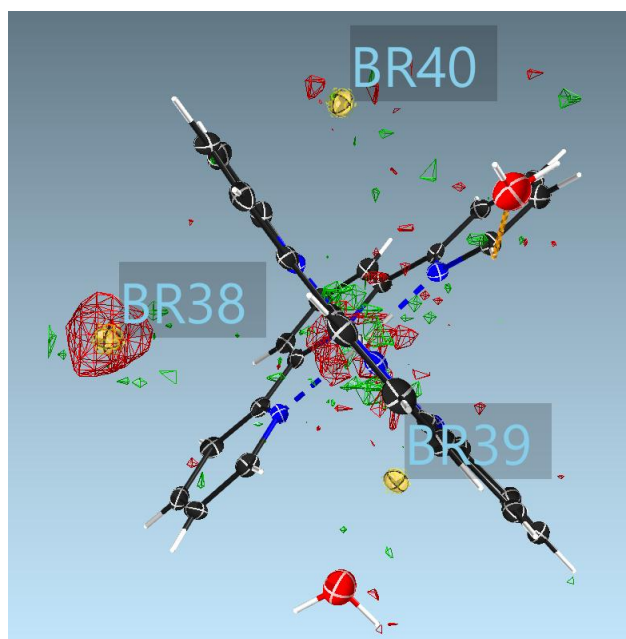

**Fig. S6.** Electron density depletion in Br38 for  $[\text{Ir}(\text{tpy})_2]\text{Br}_3 \cdot 2\text{H}_2\text{O}$  (**M2**). Red and green isosurfaces indicate negative and positive residual electron densities, respectively.

**(v) Simulation of PXRD patterns for M7 and M2**

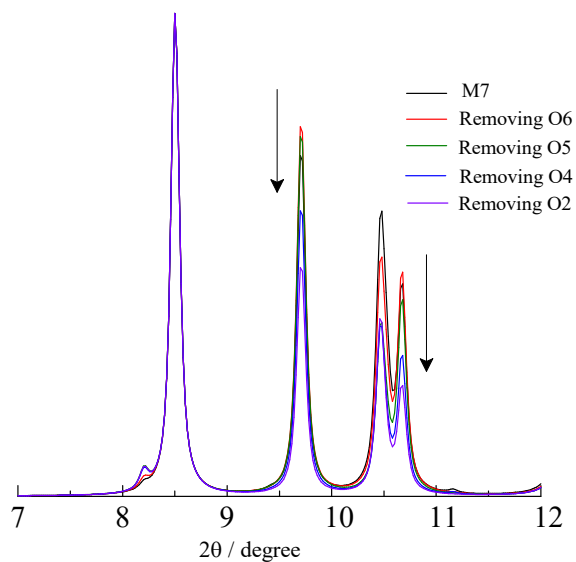

**Fig. S7.** Simulations of PXRD patterns for **M6–M3** removed  $\text{H}_2\text{O}$  one by one from atomic coordinates in CIF of **M7**. The peaks at  $2q = 8.5^\circ$  are normalized. The simulation patterns are produced by using Mercury.<sup>s1</sup>

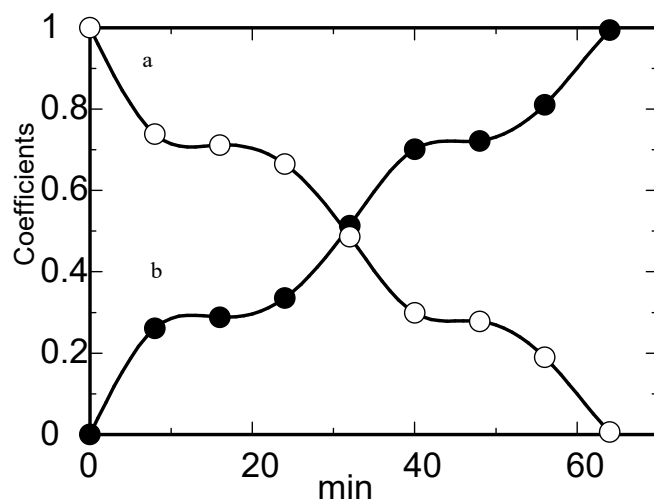

**Fig. S8.** Plots of coefficients ( $a$  and  $b$ ) obtained for the simulations of PXRD patterns during the transition from **M2** to **M7** using  $I = aI(\mathbf{M2}) + bI(\mathbf{M7})$ .  $I(\mathbf{M2})$  and  $I(\mathbf{M7})$  are simulated patterns for **M2** and **M7**, respectively.

(vi) PXRD results for M7, M2, M1, M0

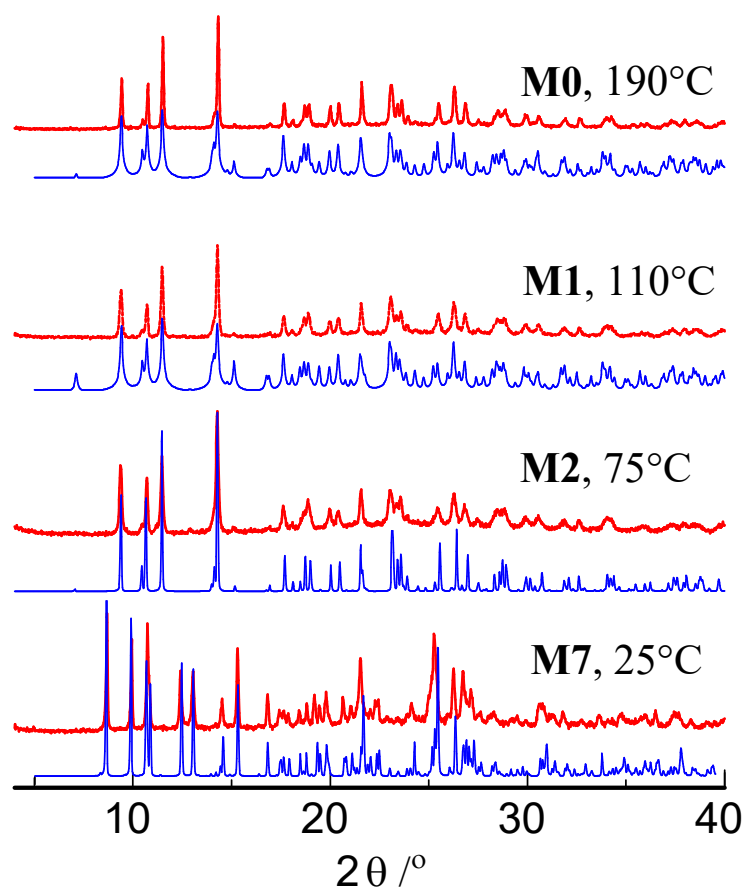

**Fig. S9.** PXRD patterns (red) and their simulation (blue) for [Ir(tpy)<sub>2</sub>]Br<sub>3</sub>·nH<sub>2</sub>O (Mn, n = 7, 2, 1, 0). The simulations of M2 and M7 are produced from the results of single crystal X-ray diffraction analysis using Mercury program<sup>s1</sup> and those of M1 and M0 are predicted by using Rietan program.<sup>s2</sup>

**Table S5** Lattice parameters predicted by the Rietveld analysis using the Rietan program.<sup>s2</sup>

|                   | <i>a</i> (Å) | <i>b</i> (Å) | <i>c</i> (Å) | $\alpha$ (°) | $\beta$ (°) | $\gamma$ (°) | <i>V</i> (Å <sup>3</sup> ) |
|-------------------|--------------|--------------|--------------|--------------|-------------|--------------|----------------------------|
| <b>M2</b> (75°C)  | 9.82917      | 16.5294      | 18.7986      | 90.0         | 90.0        | 90.0         | 3054.21                    |
| <b>M1</b> (110°C) | 9.81466      | 16.5161      | 18.7709      | 90.0         | 90.0        | 90.0         | 3042.76                    |
| <b>M0</b> (190°C) | 9.81552      | 16.4899      | 18.7783      | 90.0         | 90.0        | 90.0         | 3039.4                     |

### (vii) Emission spectrum of M7 at 77K

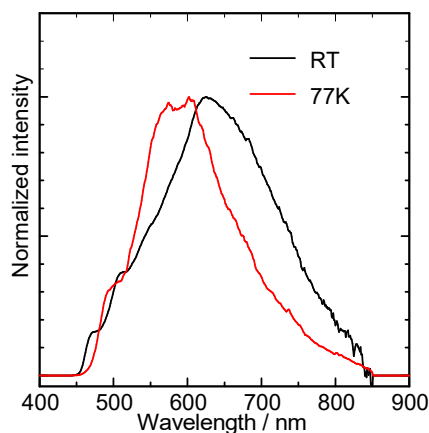

**Fig. S10.** Emission spectrum (red) of **M7** at 77 K is blue shifted compared with that at RT. Although the emission intensity is enhanced at 77 K, a shoulder assignable the p-p\* emission is still observed at around 500 nm.

### (viii) Emission lifetime of M7 and M2

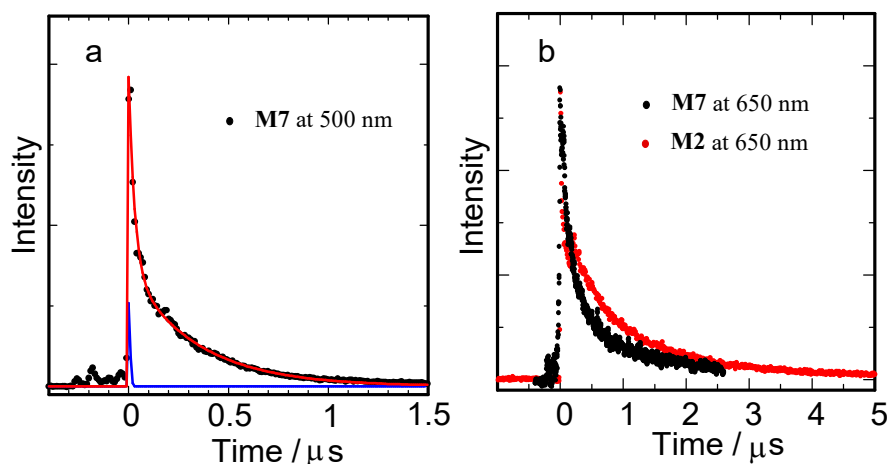

**Fig. S11.** (a) An emission time-course of **M7** (black dots) monitored at 500 nm consisting of fast and slow decays. The red line is the best fit using a double exponential function. The slow component of emission lifetime is determined as  $\tau = 300$  ns, while the fast component is estimated to be 20 ns. The blue line is the pulse profile of N<sub>2</sub> laser with FWHM of ca. 20 ns. (b) Emission decay curves of **M2** (red dots) and **M7** (black dots) monitored at 650 nm after the N<sub>2</sub> laser excitation. The emission lifetimes of **M2** and **M7** are  $\tau = 860$  ns and 540 ns, respectively.

**(ix) Vapchromic behaviours for the M7–M2 system**

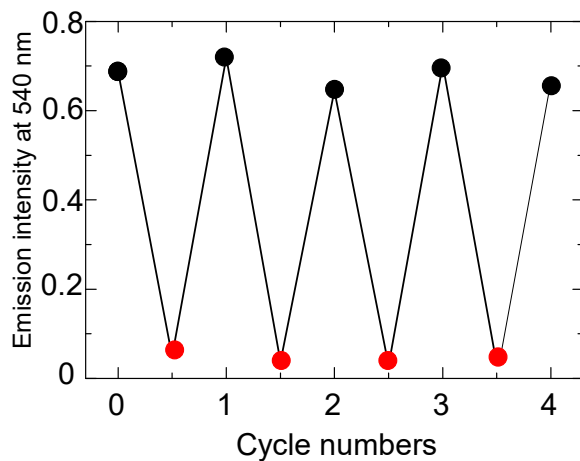

**Fig. S12.** A plot of emission intensities at 540 nm, the emission peak wavelength of  $[\text{Ir}(\text{tpy})_2]\text{Br}_3 \cdot 7\text{H}_2\text{O}$ . Black and red circles are peak intensities observed upon heating at  $80^\circ\text{C}$  and cooling at room temperature, respectively.

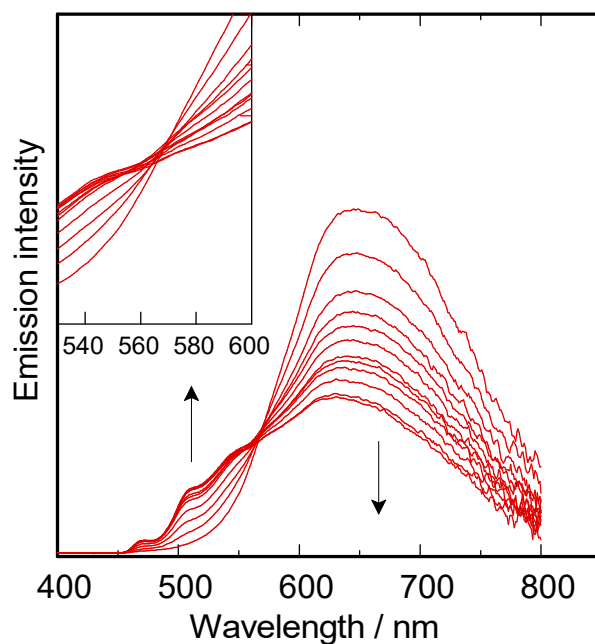

**Fig. S13.** A change in emission spectrum of **M2** during the cooling at room temperature. While the broad spectrum decreases and the structured spectrum grows with an iso-emissive point at around 570 nm at the beginning, the iso-emissive point disappears gradually (inset).

**(x) Vapochromic behaviours for the M2-M0 system**

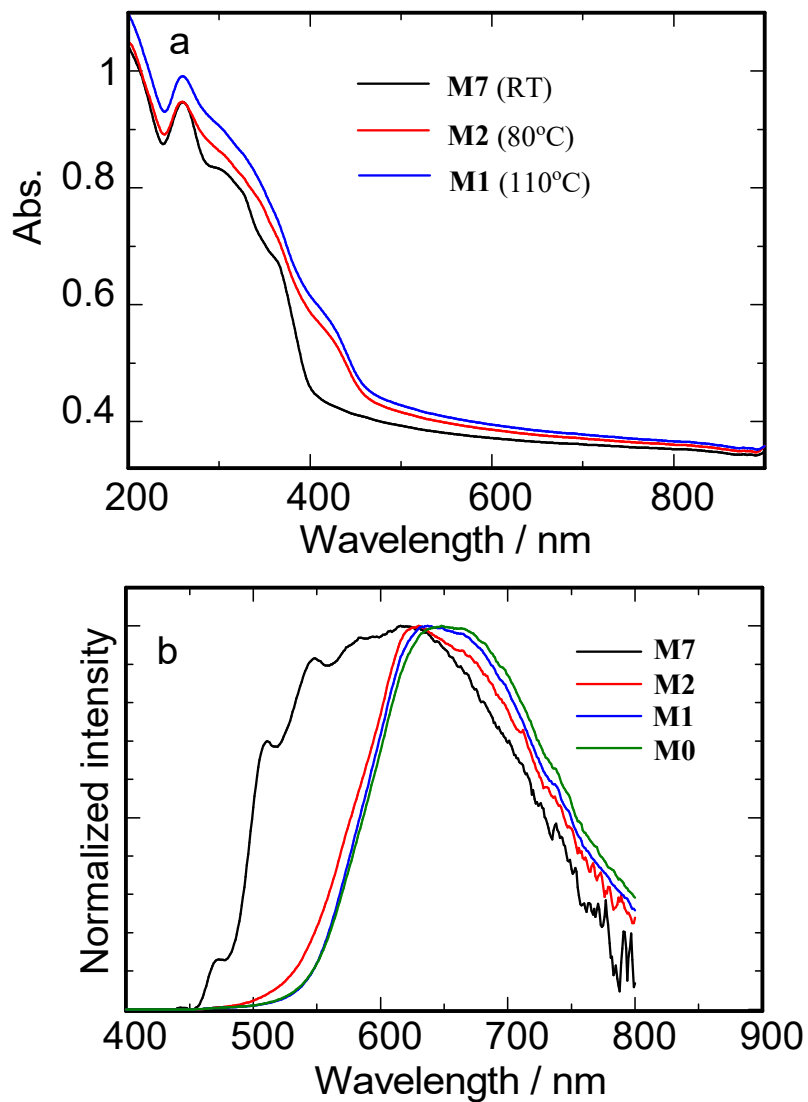

**Fig. S14.** UV-vis absorption (a) and emission (b) spectra of **M7**, **M2**, **M1**, **M0**

## **(xi) Reference**

- s1. C. F. Macrae, P. R. Edgington, P. McCabe, E. Pidcock, G. P. Shields, R. Taylor, M. Towler and J. van de Streek, *J. Appl. Crystallogr.*, 2006, **39**, 453–457.
- s2. F. Izumi and K. Momma, *Solid State Phenom.*, 2007, **130**, 15–20.
